# Supplementary material for: Development of a Model System for Gas Cavity Formation Behavior of Magnesium Alloy Implantation
Source: PubMed Central journal article supplement — ACS Biomater Sci Eng. 2022 May 23;8(6):2437–44. doi: 10.1021/acsbiomaterials.1c01429 (PMC9199520; doi:10.1021/acsbiomaterials.1c01429), 2022-05-23
Supplement: ab1c01429_si_001.pdf [file ab1c01429_si_001.pdf]

Supporting Information materials

Manuscript title: Development of a model system for gas cavity formation behavior of magnesium alloy implantation

Authors: Akiko Yamamoto and Akemi Kikuta

Affiliation: Research Center for Functional Materials, National Institute for Materials Sciences

1 page

1 Table

No figure

Table S1. The weight loss per initial sample surface area,  $W_{loss}$  of the AZ31 screws with different thickness of PLLA coating after 28d of gel immersion (average  $\pm$ standard deviation)

|                                          |                  |                  |                  |
|------------------------------------------|------------------|------------------|------------------|
| Coating thickness( $\mu\text{m}$ )       | 1.04 $\pm$ 0.04  | 1.61 $\pm$ 0.19  | 2.02 $\pm$ 0.11  |
| $W_{loss}$ ( $\mu\text{g}/\text{mm}^2$ ) | 20.16 $\pm$ 2.93 | 18.47 $\pm$ 2.84 | 11.34 $\pm$ 3.54 |
